# Supplementary material
Source: publisher site journal article supplement (https://static.cambridge.org/content/id/urn:cambridge.org:id:article:S104161021800220X/resource/name/S104161021800220X_supp003.docx)
Supplement: Supplementary file 1 [file S104161021800220X_supp003.docx]

**Appendix A2 (.docx, 15.1KB):**

Description: Percentage and number of patients, broken out into dementia type, who selected misplacing objects categories and descriptions for tracking

**Appendix A2:** Categories of misplacing identified as a target for tracking, by dementia type (% (n) of patients by type)

|  | **Alzheimer's Disease** | **Dementia with Lewy Bodies  or Parkinson's Dementia** | **Fronto-temporal Dementia** | **Vascular Dementia** | **All Patients** |
| --- | --- | --- | --- | --- | --- |
| **Misplacing Objects Description** | *N* = 142 | *N* = 13 | *N* = 19 | *N* = 45 | *N* = 219 |
| **Lost and Found** | 93 (132) | 92 (12) | 100 (19) | 96 (43) | 94 (206) |
| Frequently misplaces common items (e.g. glasses brush TV remote keys) | 79 (112) | 69 (9) | 95 (18) | 89 (40) | 82 (179) |
| Wanders off with items and leaves them in uncommon places | 36 (51) | 15 (2) | 74 (14) | 42 (19) | 39 (86) |
| Can remember using something but can't remember where they put it | 53 (75) | 54 (7) | 89 (17) | 58 (26) | 57 (125) |
| Always looking for something | 33 (47) | 54 (7) | 58 (11) | 56 (25) | 41 (90) |
| Takes longer to locate missing items | 46 (66) | 62 (8) | 68 (13) | 51 (23) | 50 (110) |
| **Hidden Away** | 88 (125) | 85 (11) | 89 (17) | 96 (43) | 89 (196) |
| Frequently misplaces important items or documents (e.g. money bills identification) | 60 (85) | 31 (4) | 68 (13) | 71 (32) | 61 (134) |
| Puts an item away for safekeeping then can't relocate the item | 53 (75) | 46 (6) | 53 (10) | 73 (33) | 57 (124) |
| Notices something is not in its place and wonders where it went (e.g. a vase a clock) | 28 (40) | 15 (2) | 37 (7) | 33 (15) | 29 (64) |
| Needs help from others to find missing items | 49 (70) | 69 (9) | 74 (14) | 76 (34) | 58 (127) |
| Hides or hoards items | 13 (18) | 23 (3) | 5 (1) | 36 (16) | 17 (38) |
| **Odd Places** | 58 (82) | 69 (9) | 79 (15) | 67 (30) | 62 (136) |
| Can't remember where things go (e.g. their proper place) | 32 (45) | 38 (5) | 47 (9) | 38 (17) | 35 (76) |
| Puts things away in the wrong place | 42 (59) | 38 (5) | 47 (9) | 51 (23) | 44 (96) |
| Puts things away in an odd place (e.g. eyeglasses in the freezer) | 28 (40) | 54 (7) | 21 (4) | 38 (17) | 31 (68) |
| Forgets what is lost while they are looking for the item | 24 (34) | 8 (1) | 42 (8) | 24 (11) | 25 (54) |
